# Supplementary material for: Tuning Myogenesis by Controlling Gelatin Hydrogel Properties through Hydrogen Peroxide-Mediated Cross-Linking and Degradation
Source: MDPI journal article supplement (doi:10.3390/gels8060387), 2022-06-17
Supplement: s1 [file s1]

Supplementary Information

# Tuning Myogenesis by Controlling Gelatin Hydrogel Properties through Hydrogen Peroxide-Mediated Cross-Linking and Degradation

Wildan Mubarak, Kelum Chamara Manoj Lakmal Elvitigala and Shinji Sakai \*

Department of Materials Engineering Science, Graduate School of Engineering Science, Osaka University, Toyonaka 560-8531, Japan; wildanmubarak@cheng.es.osaka-u.ac.jp (W.M.); kelum@cheng.es.osaka-u.ac.jp (K.C.M.L.E.)

\*Correspondence: sakai@cheng.es.osaka-u.ac.jp

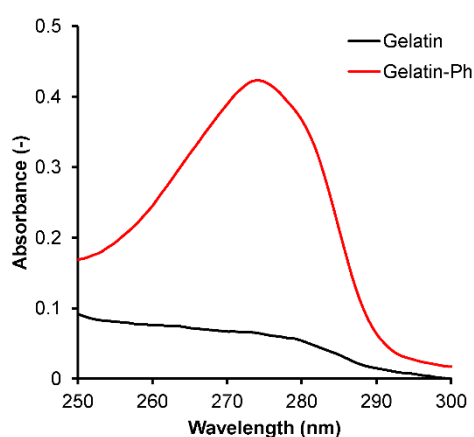

**Figure S1.** UV-Vis absorbance of unmodified gelatin and Gelatin-Ph. Notice the peak at 275 nm corresponding to the Ph group.

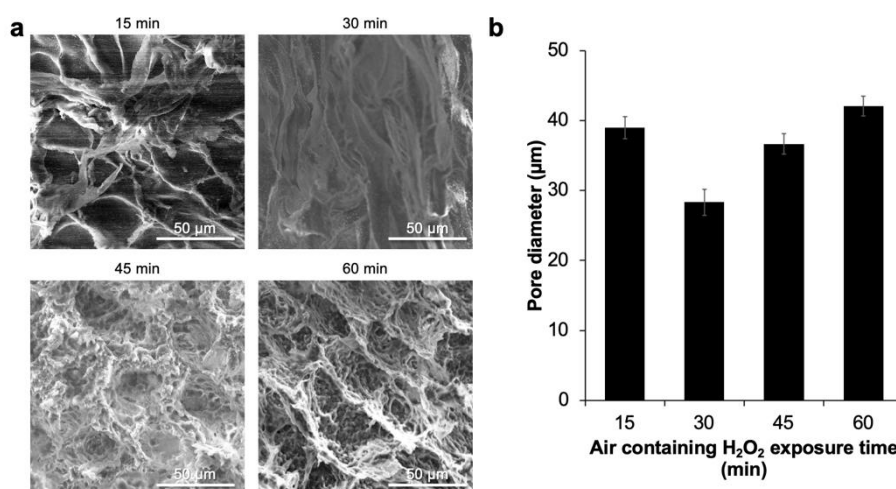

**Figure S2.** (a) Scanning electron microscope (SEM) observation of the cross-section of Gelatin-Ph hydrogel. (b) Pore size of the Gelatin-Ph hydrogel obtained through different air containing H<sub>2</sub>O<sub>2</sub> exposure times. Bar: S.E. (*n* = 40).

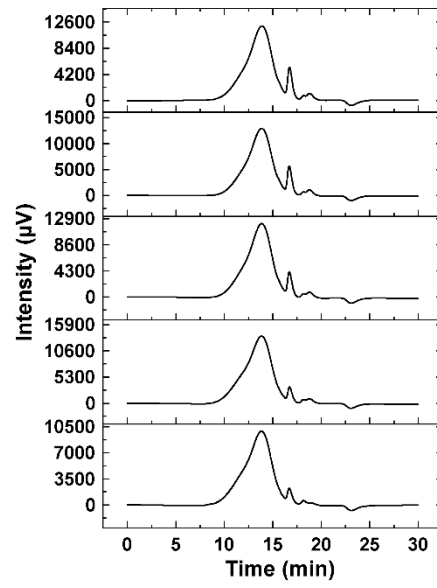

**Figure S3.** Intensity-time curve of the Gelatin-Ph exposed with air containing  $\text{H}_2\text{O}_2$  for 0–60 min.

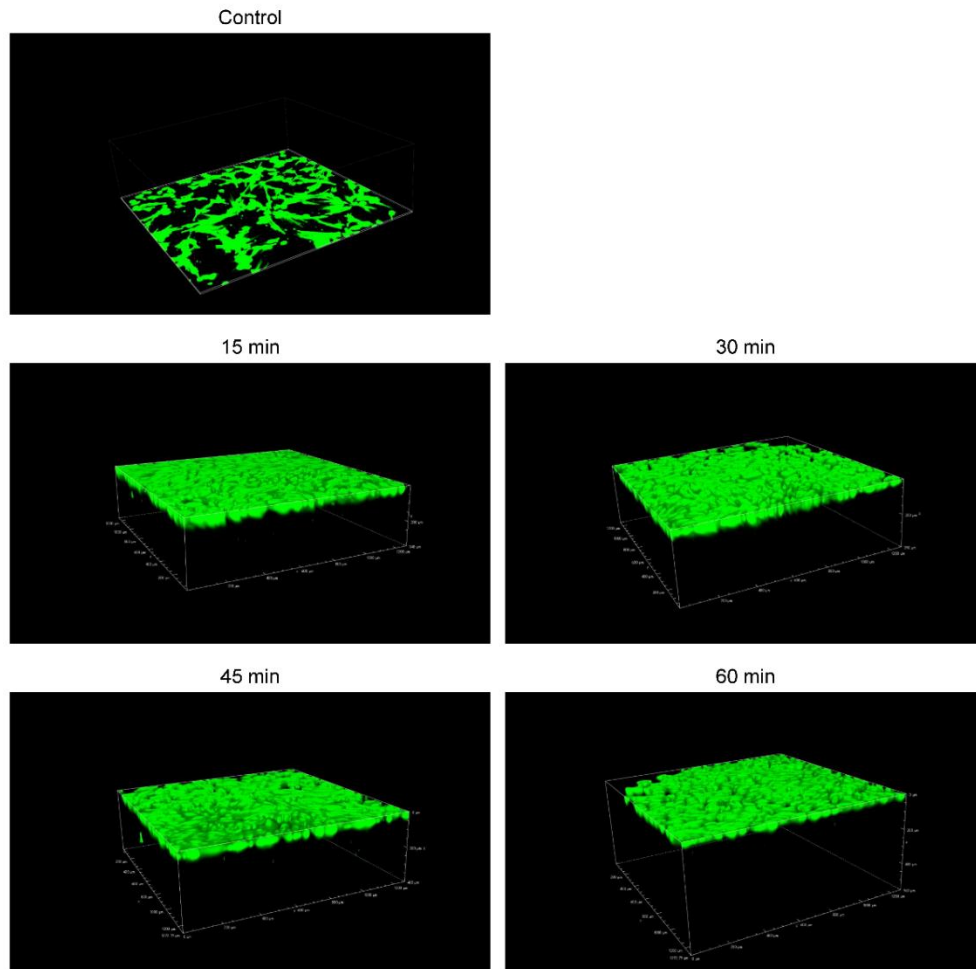

**Figure S4.** Confocal laser-scanning microscope observation of the C2C12 myoblasts on the culture well plate (control) and Gelatin-Ph hydrogel obtained through exposure to air containing  $\text{H}_2\text{O}_2$  for 15, 30, 45 and 60 min. Cells were observed by staining with Calcein-AM on day 2 of culture.

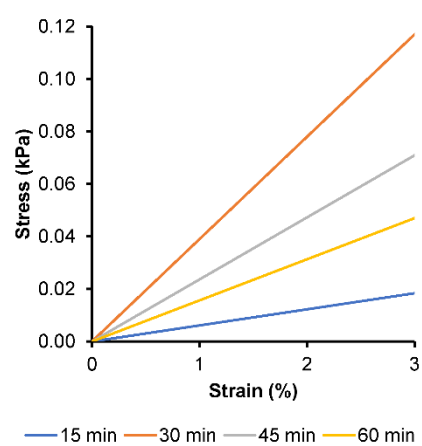

**Figure S5.** Stress-strain curve of Gelatin-Ph hydrogel fabricated by exposing solution containing 3.0% w/v Gelatin-Ph and  $1 \text{ U mL}^{-1}$  HRP with air containing  $\text{H}_2\text{O}_2$  for 15, 30, 45 and 60 min.
